# Supplementary material for: Risk and life cycle assessment of nanoparticles for medical applications prepared using safe- and benign-by-design gas-phase syntheses
Source: Royal Society of Chemistry journal article supplement (doi:10.1039/c9gc02436k), 2020-01-01
Supplement: c9gc02436k1.pdf [file c9gc02436k1.pdf]

## Supplementary Information

Risk and Life Cycle Assessment of Nanoparticles for Medical Applications Prepared Using Safe- and Benign-by-Design Gas-Phase Syntheses

P. Weyell<sup>a</sup>, H.-D. Kurland<sup>b</sup>, T. Hülser<sup>c</sup>, J. Grabow<sup>b</sup>, F. A. Müller<sup>b</sup> and D. Kralisch<sup>a\*</sup>

- a Friedrich Schiller University Jena, Pharmaceutical Technology and Biopharmacy, Lessingstraße 8, 07743 Jena, Germany. \*Email: dana.kralisch@uni-jena.de; Fax: +49 3641 949942; Phone: +49 3641 949951  
b Friedrich Schiller University Jena, Otto Schott Institute of Materials Research (OSIM), Löbdergraben 32, 07743 Jena, Germany.  
c Institute of Energy and Environmental Technology e.V. (IUTA), Bliersheimer Straße 58-60, 47229 Duisburg, Germany.

**Table 1:** Results of XRF-Analysis of the (Co)LAVA nanopowders.

| Nanoparticles                    | XRF-Analysis                   |        |
|----------------------------------|--------------------------------|--------|
|                                  | Compound/Element               | Mass%  |
| SiliFe                           | SiO <sub>2</sub>               | 63.30  |
|                                  | Fe <sub>2</sub> O <sub>3</sub> | 36.29  |
|                                  | K                              | 0.28   |
|                                  | Mn                             | 0.06   |
|                                  | S                              | 0.06   |
|                                  | Ni                             | 0.01   |
|                                  | Zn                             | 85 ppm |
|                                  | S                              | 0.02   |
| γ-Fe <sub>2</sub> O <sub>3</sub> | Fe <sub>2</sub> O <sub>3</sub> | 99.69  |
|                                  | Mn                             | 0.18   |
|                                  | S                              | 0.05   |
|                                  | Ni                             | 0.02   |
|                                  | Zn                             | 0.03   |
|                                  | Si                             | 0.03   |

## Supplementary Information

**Table 2:** Life Cycle Inventory – Pharmaceutical manufacturing

| Ecoinvent v3.2 datasets                                        | Input                  |                                          | Output                   |                                     |
|----------------------------------------------------------------|------------------------|------------------------------------------|--------------------------|-------------------------------------|
| Transport and logistic                                         |                        |                                          |                          |                                     |
| Market for petrol, unleaded [RER]                              | Petrol                 | 2.13 g <sup>a</sup>                      | 1 unit <sup>b</sup>      | Pharma manufacturing (1 kg product) |
| Maintenance, lorry 28 metric ton [CH]                          | Maintenance lorry      | 7.69·10 <sup>-7</sup> unit <sup>c</sup>  | Emissions                |                                     |
| Market for lorry, 28 metric ton [GLO]                          | Lorry                  | 7.69·10 <sup>-7</sup> unit <sup>c</sup>  | 0.98 kg                  | Carbon dioxide                      |
| Packaging                                                      |                        |                                          | 9.95·10 <sup>-4</sup> kg | Nitrogen oxides                     |
| Offset printing, per kg printed paper [CH]                     | Paper                  | 0.33 kg <sup>d</sup>                     | 1.87·10 <sup>-4</sup> kg | Sulfur dioxide                      |
| Market for packaging glass, white [GLO]                        | Packaging glass, white | 0.36 kg <sup>d</sup>                     |                          |                                     |
| Carton board box production service, with offset printing [CH] | Carton box             | 0.33 kg <sup>d</sup>                     |                          |                                     |
| Sterilisation                                                  |                        |                                          |                          |                                     |
| Market for water, deionised, from tap water, at user [GLO]     | Water                  | 1.16·10 <sup>-3</sup> kg <sup>e</sup>    |                          |                                     |
| Market for steel, chromiumsteel 18/8 [GLO]                     | Steel                  | 1.12·10 <sup>-6</sup> kg <sup>e</sup>    |                          |                                     |
| Pharmaceutical factory, construction of facilities             |                        |                                          |                          |                                     |
| Chemical factory construction, organics [RER]                  | Pharmaceutical factory | 5.49·10 <sup>-10</sup> unit <sup>f</sup> |                          |                                     |
| Energy consumption                                             |                        |                                          |                          |                                     |
| Natural gas production [DE]                                    | Natural gas            | 0.21 m <sup>3</sup>                      |                          |                                     |
| Market for light fuel oil [Europe without Switzerland]         | Fuel oil               | 6.25 g                                   |                          |                                     |
| Market for electricity, medium voltage [DE]                    | Electricity            | 1.66 kWh                                 |                          |                                     |

<sup>a</sup> 27.7 L petrol / 100 km, average density 0.75 kg/L, 14 lorries, 13341 km per lorry per year <sup>1</sup>

<sup>b</sup> 1 unit = 18200 t product per year

<sup>c</sup> 14 units<sup>2</sup>

<sup>d</sup> Representative data for primary and secondary packaging material, e.g. filling of Gadovist® in vials, printed patient information's, product transport in carton boxes.

<sup>e</sup> Sterilisation of 2618 t product per year, 15 L water / 540 kg product, autoclave 700 kg / life time 10 years

<sup>f</sup> 1 unit = 1 factory with life time of 100 years

<sup>1</sup> KBA (the Federal Bureau of Motor Vehicles and Drivers), 2016.

<sup>2</sup> <https://www.lichteindruck.de/projekte/teva-ratiopharm/> (accessed 16<sup>th</sup> October 2017)

## Supplementary Information

**Table 3:** Pedigree data quality matrix<sup>3</sup>.

|          | Indicator score                          | 1                                                                                                             | 2                                                                            | 3                                                                             | 4                                                                                                                                      | 5                                                                                                        |
|----------|------------------------------------------|---------------------------------------------------------------------------------------------------------------|------------------------------------------------------------------------------|-------------------------------------------------------------------------------|----------------------------------------------------------------------------------------------------------------------------------------|----------------------------------------------------------------------------------------------------------|
| <b>A</b> | <b>Reliability of the source</b>         | Verified data based on measurements                                                                           | Verified data partly assumptions or non-verified data based on measurements  | Non-verified data partly based on assumptions                                 | Qualified expert estimation                                                                                                            | Non-qualified estimate or unknown origin                                                                 |
| <b>B</b> | <b>Completeness</b>                      | Representative data from a sufficient sample of sites over an adequate period to even out normal fluctuations | Representative data from a smaller number of sites but for adequate periods  | Representative data from an adequate number of sites but from shorter periods | Representative data from a smaller number of sites and shorter periods or incomplete data from an adequate number of sites and periods | Representativeness unknown or incomplete data from a smaller number of sites and/or from shorter periods |
| <b>C</b> | <b>Temporal correlation</b>              | Less than 3 years of difference to year of study                                                              | Less than 6 years of difference                                              | Less than 10 years of difference                                              | Less than 15 years of difference                                                                                                       | Age of data unknown or more than 15 years of difference                                                  |
| <b>D</b> | <b>Geographical correlation</b>          | Data from area under study                                                                                    | Average data from larger area in which the area under study is included      | Data from area with similar production conditions                             | Data from area with slightly similar production conditions                                                                             | Data from unknown area or area with different production conditions                                      |
| <b>E</b> | <b>Further technological correlation</b> | Data from enterprises, processes and materials under study                                                    | Data from processes and materials under study but from different enterprises | Data from processes and materials under study but from different technology   | Data on related processes or materials but from same technology                                                                        | Unknown technology or data on related processes or materials, but from different technology              |

<sup>3</sup> B. P. Weidema, *The International Journal of Life Cycle Assessment*, 1998, 3, 259-265.

## Supplementary Information

**Table 4:** Data quality assessment for LCI models on manufacturing of SiliFe- and  $\gamma$ -Fe<sub>2</sub>O<sub>3</sub> by laservaporisation in (Co)LAVA-process, flame spray pyrolysis (FSP) and synthesis of reference Gadovist® (Gd).

| Data sets from Ecoinvent data base v 3.2;<br>allocation cut-off (results)<br>[CH] = Swiss, [DE] = German,<br>[RER] = European, [GLOB] = global | Model                 | A | B | C | D | E |
|------------------------------------------------------------------------------------------------------------------------------------------------|-----------------------|---|---|---|---|---|
| Anionic resin production [CH]                                                                                                                  | Gd                    | 3 | 4 | 5 | 3 | 1 |
| Argon production, liquid [RER]                                                                                                                 | (Co)LAVA              | 3 | 4 | 1 | 5 | 1 |
| Cationic resin production [CH]                                                                                                                 | Gd                    | 3 | 4 | 5 | 3 | 1 |
| Carbon dioxide production, liquid [RER]                                                                                                        | (Co)LAVA              | 3 | 2 | 5 | 3 | 2 |
| Carton board box production service, with<br>offset printing [CH]                                                                              | FSP<br>(Co)LAVA<br>Gd | 2 | 2 | 1 | 3 | 4 |
| Chloroacetic acid production [RER]                                                                                                             | Gd                    | 3 | 2 | 1 | 2 | 1 |
| Compressed air production, 800 kPa gauge,<br><30kW, average generation [RER]                                                                   | FSP<br>(Co)LAVA       | 3 | 5 | 1 | 2 | 3 |
| Chromium steel pipe production [GLO]                                                                                                           | FSP<br>(Co)LAVA       | 5 | 4 | 1 | 2 | 2 |
| Dichloromethane production [RER]                                                                                                               | Gd                    | 1 | 2 | 1 | 2 | 2 |
| Diethyl ether production [GLO]                                                                                                                 | Gd                    | 2 | 4 | 1 | 2 | 2 |
| N,N-dimethylformamide production [RER]                                                                                                         | Gd                    | 2 | 4 | 1 | 2 | 1 |
| Electricity, high voltage, production mix<br>[DE]                                                                                              | (Co)LAVA              | 5 | 5 | 1 | 1 | 5 |
| Ethyl acetate production [RER]                                                                                                                 | Gd                    | 1 | 4 | 1 | 2 | 1 |
| Glass tube production, borosilicate [DE]                                                                                                       | (Co)LAVA              | 2 | 2 | 1 | 1 | 4 |
| Heat pump production, 30kW [RER]                                                                                                               | (Co)LAVA              | 4 | 4 | 1 | 2 | 4 |
| Isopropanol production [RER]                                                                                                                   | FSP                   | 3 | 4 | 1 | 2 | 1 |
| Maintenance lorry 28 metric ton [CH]                                                                                                           | FSP<br>LAVA<br>Gd     | 4 | 4 | 1 | 3 | 2 |
| Market for acetone [GLO]                                                                                                                       | Gd                    | 2 | 2 | 1 | 1 | 1 |
| Market for acetonitrile [GLO]                                                                                                                  | Gd                    | 2 | 2 | 1 | 2 | 2 |
| Market for acetylene [GLO]                                                                                                                     | Gd                    | 3 | 5 | 1 | 3 | 5 |
| Market for benzaldehyde [GLO]                                                                                                                  | Gd                    | 3 | 3 | 4 | 1 | 1 |
| Market for chlorine, liquid [GLO]                                                                                                              | (Co)LAVA              | 1 | 4 | 1 | 2 | 2 |
| Market for chlorosulfonic acid [GLO]                                                                                                           | Gd                    | 2 | 2 | 4 | 2 | 4 |
| Market for copper [GLO]                                                                                                                        | Gd                    | 2 | 4 | 3 | 2 | 2 |
| Market for dichloromethane [GLO]                                                                                                               | Gd                    | 3 | 4 | 5 | 2 | 2 |
| Market for diethanolamine [GLO]                                                                                                                | Gd                    | 3 | 2 | 5 | 5 | 2 |
| Market for dioxane [GLO]                                                                                                                       | Gd                    | 3 | 2 | 4 | 2 | 2 |
| Market for electricity, medium voltage [DE]                                                                                                    | FSP<br>(Co)LAVA<br>Gd | 1 | 1 | 3 | 1 | 5 |
| Market for ethanol, without water, in 99.7%<br>solution state, from fermentation, at<br>service station [CH]                                   | Gd                    | 3 | 3 | 1 | 3 | 1 |
| Market for ethylenediamine [GLO]                                                                                                               | Gd                    | 3 | 4 | 5 | 2 | 1 |
| Market for ethylene carbonate [GLO]                                                                                                            | Gd                    | 2 | 3 | 1 | 2 | 2 |
| Market for formaldehyde [GLO]                                                                                                                  | Gd                    | 1 | 4 | 1 | 2 | 1 |
| Market for helium [GLO]                                                                                                                        | (Co)LAVA              | 2 | 4 | 1 | 2 | 1 |
| Market for hydrochloric acid, without<br>water, in 30% solution state [RER]                                                                    | Gd                    | 2 | 2 | 1 | 2 | 2 |
| Market for hydrogen, liquid [RER]                                                                                                              | Gd                    | 5 | 3 | 1 | 2 | 5 |

## Supplementary Information

(Table 4 continued)

|                                                                                 |                       |   |   |   |   |   |
|---------------------------------------------------------------------------------|-----------------------|---|---|---|---|---|
| Market for hydrogen peroxide, without water, in 50% solution state [GLO]        | Gd                    | 1 | 3 | 1 | 2 | 1 |
| Market for iron (III) chloride, without water, in 40% solution state [GLO]      | Gd                    | 3 | 3 | 1 | 3 | 1 |
| Market for iron scrap, sorted, pressed [GLO]                                    | (Co)LAVA              | 3 | 4 | 1 | 2 | 2 |
| Market for lead concentrate [GLO]                                               | Gd                    | 2 | 3 | 1 | 2 | 1 |
| Market for light fuel oil [Europe without Switzerland]                          | FSP<br>(Co)LAVA<br>Gd | 1 | 1 | 1 | 2 | 1 |
| Market for lorry, 28 metric ton [GLO]                                           | FSP<br>(Co)LAVA<br>Gd | 5 | 5 | 1 | 2 | 5 |
| Market for magnesium sulfate [GLO]                                              | Gd                    | 3 | 5 | 1 | 2 | 4 |
| Market for methane, 96% by volume [GLO]                                         | FSP                   | 3 | 4 | 1 | 2 | 2 |
| Market for N,N-dimethylformamide [GLO]                                          | Gd                    | 3 | 5 | 1 | 2 | 1 |
| Market for nitrogen, liquid [RER]                                               | FSP<br>(Co)LAVA       | 1 | 1 | 1 | 2 | 1 |
| Market for oxygen, liquid [RER]                                                 | FSP                   | 3 | 1 | 1 | 2 | 5 |
| Market for petrol, unleaded [RER]                                               | FSP<br>(Co)LAVA<br>Gd | 1 | 2 | 1 | 2 | 5 |
| Market for pig iron [GLO]                                                       | FSP                   | 4 | 5 | 1 | 2 | 1 |
| Market for pyridine [GLO]                                                       | Gd                    | 1 | 2 | 4 | 2 | 1 |
| Market for samarium europium gadolinium concentrate, 94% rare earth oxide [GLO] | Gd                    | 1 | 1 | 1 | 1 | 1 |
| Market for selenium [GLO]                                                       | (Co)LAVA              | 3 | 1 | 1 | 5 | 1 |
| Market for sodium hydroxide, without water, in 50% solution state [GLO]         | (Co)LAVA<br>Gd        | 1 | 1 | 1 | 2 | 2 |
| Market for steel, chromium steel 18/8 [GLO]                                     | FSP<br>(Co)LAVA       | 4 | 5 | 1 | 2 | 5 |
| Market for sulfur [GLO]                                                         | Gd                    | 3 | 2 | 1 | 2 | 1 |
| Market for sulfuric acid [GLO]                                                  | Gd                    | 2 | 1 | 5 | 2 | 1 |
| Market for transport, freight, lorry 16-32 metric ton, EURO4 [GLO]              | FSP<br>(Co)LAVA<br>Gd | 3 | 2 | 1 | 3 | 1 |
| Market for water, deionized, from tap water, at user [CH]                       | FSP<br>(Co)LAVA<br>Gd | 2 | 3 | 1 | 3 | 1 |
| Market for zinc oxide [GLO]                                                     | (Co)LAVA              | 3 | 1 | 4 | 5 | 1 |
| Market for zinc sulfide [GLO]                                                   | (Co)LAVA              | 3 | 1 | 4 | 5 | 1 |
| Methanol production, from synthetic gas [CH]                                    | Gd                    | 1 | 4 | 1 | 3 | 3 |
| Municipal waste incineration facility construction [CH]                         | FSP                   | 2 | 4 | 1 | 3 | 3 |
| Natural gas production [DE]                                                     | FSP<br>(Co)LAVA<br>Gd | 1 | 3 | 5 | 1 | 1 |
| Nitric acid production, product in 50% solution state [RER]                     | FSP<br>Gd             | 1 | 1 | 5 | 2 | 1 |
| Offset printing, per kg printed paper [CH]                                      | FSP<br>LAVA<br>Gd     | 1 | 2 | 1 | 3 | 3 |

## Supplementary Information

(Table 4 continued)

|                                                                                           |                       |   |   |   |   |   |
|-------------------------------------------------------------------------------------------|-----------------------|---|---|---|---|---|
| Market for packaging glass production, white [GLO]                                        | FSP<br>LAVA<br>Gd     | 2 | 5 | 1 | 1 | 4 |
| Market for palladium [GLO]                                                                | Gd                    | 1 | 2 | 1 | 3 | 3 |
| Market for zinc concentrate [GLO]                                                         | Gd                    | 1 | 3 | 1 | 3 | 2 |
| Pig iron production [GLO]                                                                 | FSP                   | 3 | 1 | 1 | 2 | 1 |
| Potassium hydroxide production [RER]                                                      | Gd                    | 1 | 5 | 1 | 3 | 2 |
| Process-specific burdens, hazardous waste incineration plant [CH]                         | FSP                   | 1 | 3 | 1 | 3 | 2 |
| Silicon carbide production [RER]                                                          | FSP                   | 2 | 3 | 1 | 2 | 3 |
| Silica sand production [DE]                                                               | (Co)LAVA<br>Gd        | 2 | 4 | 1 | 1 | 3 |
| Sodium ethoxide production [RER]                                                          | Gd                    | 1 | 4 | 4 | 2 | 1 |
| Steam production in chemical industry [RER]                                               | FSP<br>(Co)LAVA<br>Gd | 1 | 1 | 1 | 2 | 2 |
| Sulfuric acid production [RER]                                                            | Gd                    | 1 | 4 | 5 | 2 | 2 |
| Toluene production, liquid [RER]                                                          | Gd                    | 1 | 1 | 1 | 2 | 1 |
| Treatment of hazardous waste, hazardous waste incineration [CH]                           | Gd                    | 1 | 2 | 1 | 3 | 1 |
| Trimethylamine production [RER]                                                           | Gd                    | 3 | 4 | 5 | 2 | 4 |
| Ventilation system production, decentralized, 6 x 120 m <sup>3</sup> /h, steel ducts [CH] | FSP<br>(Co)LAVA       | 3 | 3 | 1 | 3 | 3 |
| Water production, deionized, from tap water, at user [CH]                                 | FSP<br>(Co)LAVA<br>Gd | 2 | 3 | 1 | 3 | 1 |
| <b>User defined data sets</b>                                                             |                       |   |   |   |   |   |
| Autoclave in pharmaceutical manufacturing                                                 | FSP<br>(Co)LAVA<br>Gd | 1 | 4 | 2 | 1 | 1 |
| Chemical manufacturing                                                                    | FSP<br>(Co)LAVA<br>Gd | 1 | 2 | 1 | 1 | 3 |
| FSP                                                                                       | FSP                   | 2 | 2 | 1 | 1 | 1 |
| Hematite production                                                                       | (Co)LAVA              | 3 | 4 | 5 | 1 | 3 |
| Laser construction                                                                        | (Co)LAVA              | 3 | 4 | 5 | 3 | 4 |
| (Co)LAVA-process                                                                          | (Co)LAVA              | 2 | 4 | 1 | 1 | 1 |
| Production of iron (III)-nitrate                                                          | FSP                   | 3 | 5 | 3 | 5 | 5 |
| Pharmaceutical manufacturing                                                              | FSP<br>(Co)LAVA<br>Gd | 1 | 2 | 2 | 1 | 4 |
| Synthesis of cyclen as starting material for gadubutrol synthesis                         | Gd                    | 1 | 4 | 5 | 5 | 1 |
| Synthesis of gadubutrol                                                                   | Gd                    | 1 | 4 | 2 | 5 | 1 |

## Supplementary Information

**Table 5:** Modelling, references, Comments and assumptions in LCI of Gadovist®.

| Modelling                                   | Comments & Assumptions                                                                                                                                                                                                                                                                                                                                                                                                                                                    | References                                                                                                                                                                                                                                                                       |
|---------------------------------------------|---------------------------------------------------------------------------------------------------------------------------------------------------------------------------------------------------------------------------------------------------------------------------------------------------------------------------------------------------------------------------------------------------------------------------------------------------------------------------|----------------------------------------------------------------------------------------------------------------------------------------------------------------------------------------------------------------------------------------------------------------------------------|
| Chemical manufacturing                      | <p>Data set considered for modelling of chemical manufacturing for all synthesis steps</p> <p>German energy mix</p> <p>Chemical factory with a life time of 100 years, production rate of 1 675 800 t per year</p> <p>Input:<br/>Energy mix (natural gas, light fuel oil, heat by steam production, electricity)</p> <p>Output:<br/>Emissions to air (carbon dioxide, sulfur dioxide, nitrogen oxide), waste water pollutants (ammonium, chloride, nitrogen, sulfate)</p> | Umwelterklärung 2017 – Chemiepark Gendorf.                                                                                                                                                                                                                                       |
| Synthesis of gadobutrol (Gadovist®)         |                                                                                                                                                                                                                                                                                                                                                                                                                                                                           | J. Platzek et al., <i>Inorganic Chemistry</i> , 1997, <b>36</b> , p. 6086                                                                                                                                                                                                        |
| Synthesis of cyclen                         | Starting material in the synthesis of gadobutrol. Synthesis starts with tosylation of diethanolamine and diethylenetriamine followed by cyclisation.                                                                                                                                                                                                                                                                                                                      | T. J. Atkins et al., <i>Organic Syntheses</i> , 1978, <b>58</b> , p.86                                                                                                                                                                                                           |
| Tosylation                                  | Stoichiometric calculation. Reaction with para-toluene sulfonyl chloride.                                                                                                                                                                                                                                                                                                                                                                                                 | Organikum, 23. Edition, Wiley VCH Verlag GmbH, Weinheim 2009, p. 664.                                                                                                                                                                                                            |
| Synthesis of para-toluene sulfonyl chloride | Reaction of toluene with chlorosulfuric acid (molar ratio 1 : 3) at room temperature.                                                                                                                                                                                                                                                                                                                                                                                     | Organikum, 23. Edition, Wiley VCH Verlag GmbH, Weinheim 2009, p. 369.                                                                                                                                                                                                            |
| Synthesis of MOCO*                          | Starting material in the synthesis of gadobutrol. Reaction of acetylene and formaldehyde to 2-butyn-1.4-diol of formaldehyde by use of a composite catalyst based on bismuth (III) oxide and copper (II) oxide. <i>Cis</i> -2-butene-1.4-diol is formed in hydrogenation by use of palladium as catalyst. A cyclic acetal is formed in reaction with acetone. Then, the $\pi$ -bound is epoxidised in the presence of meta-chloroperbenzoic acid.                         | <p>P. Pässler et al., Acetylene. Ullmann's Encyclopedia of Industrial Chemistry, 2008.</p> <p>Organikum, 23. Edition, Wiley VCH Verlag GmbH, Weinheim 2009, p. 476.</p> <p>N. Prileschajew, <i>Berichte der deutschen chemischen Gesellschaft</i>, 1909, <b>42</b>, p. 4811.</p> |

## Supplementary Information

(Table 5 continued)

|                                                                 |                                                                                                                                                                                                                                                                                                                                                                                                                                                                                                                                                                                                                                                                                                         |                                                                                                                                                                                                                                                                                                                                                                                                                                                                                                                                                                                                                                |
|-----------------------------------------------------------------|---------------------------------------------------------------------------------------------------------------------------------------------------------------------------------------------------------------------------------------------------------------------------------------------------------------------------------------------------------------------------------------------------------------------------------------------------------------------------------------------------------------------------------------------------------------------------------------------------------------------------------------------------------------------------------------------------------|--------------------------------------------------------------------------------------------------------------------------------------------------------------------------------------------------------------------------------------------------------------------------------------------------------------------------------------------------------------------------------------------------------------------------------------------------------------------------------------------------------------------------------------------------------------------------------------------------------------------------------|
| Synthesis of <i>cis</i> -2-butene-1,4-diol                      |                                                                                                                                                                                                                                                                                                                                                                                                                                                                                                                                                                                                                                                                                                         | <p>P. Pässler et al., <i>Acetylene</i>, Ullmann's Encyclopedia of Industrial Chemistry, 2008.</p> <p>W. Reppe et al., <i>European Journal of Organic Chemistry</i>, 1955, <b>596</b>, p. 6</p> <p>H. Gräfe et al., <i>Butanediols, Butenediol, and Butynediol</i>, Ullmann's Encyclopedia of Industrial Chemistry, 2000.</p>                                                                                                                                                                                                                                                                                                   |
| Composite catalyst of bismuth (III) oxide and copper (II) oxide | <p>The production of 2-butyne-1,4-diol can be carried out continuously in a reactor cascade (3-5 reactor systems). The catalyst is implemented in a fixed bed of coated strains (diameter 4 mm, length 10 mm, volume 125.7 mm<sup>3</sup> per strain). 3 strains were assumed in each of five reactor systems with an overall volume of 1885.5 mm<sup>3</sup>. Bismuth (III) oxide and copper (II) oxide will be obtained by reaction of the respective metal nitrates (stoichiometric calculation). A dataset of the resource extraction of copper is integrated in Ecoinvent database v3.2. Bismuth is a byproduct in, e.g. lead extraction. An average value of 1000 g Bi / t Pb was considered.</p> | <p>H. Gräfe et al., <i>Butanediols, Butenediol, and Butynediol</i>, Ullmann's Encyclopedia of Industrial Chemistry, 2000.</p> <p>W. Reppe et al., <i>European Journal of Organic Chemistry</i>, 1955, <b>596</b>, p. 6</p> <p>H. W. Richardson, <i>Copper Compounds</i>, Ullmann's Encyclopedia of Industrial Chemistry, 2000.</p> <p>A. F. Holleman, E. Wiberg, N. Wiberg, <i>Lehrbuch der Anorganischen Chemie</i>, 102. Auflage. Walter de Gruyter &amp; Co, Berlin 2007, p. 827.</p> <p>J. Krüger et al., <i>Bismuth, Bismuth Alloys, and Bismuth Compounds</i>, Ullmann's Encyclopedia of Industrial Chemistry, 2003.</p> |
| Palladium catalyst                                              |                                                                                                                                                                                                                                                                                                                                                                                                                                                                                                                                                                                                                                                                                                         | Palladium catalyst, US 5063194 A. BASF, 1991.                                                                                                                                                                                                                                                                                                                                                                                                                                                                                                                                                                                  |
| Synthesis of meta-chloroperoxybenzoic acid                      | <p>Benzoyl chloride is formed in chlorination of benzaldehyde. Further functionalization to meta-chlorobenzoyl chloride in Friedel-Crafts reaction. meta-chloroperoxybenzoic acid is formed in reaction with hydrogen peroxide.</p>                                                                                                                                                                                                                                                                                                                                                                                                                                                                     | <p>Wöhler and Liebig, <i>Annalen der Pharmacie</i>, 1832, <b>3</b>, p. 249.</p> <p>EP0001252 A1. Europäische Patentschrift, 1979.</p> <p><i>Organic Syntheses</i>, 1988, <b>6</b>, p.276; <i>Organic Syntheses</i>, 1970, <b>50</b>, p.15.</p>                                                                                                                                                                                                                                                                                                                                                                                 |

\*4,4-dimethyl-3.5.8-trioxabicyclo[5.1.0]octane



## Supplementary Information

### Occupational safety assessment – Stoffenmanager Nano

#### Hazard characterisation of SiliFe nanoparticles

**Material characterisation:** Superparamagnetic SiliFe composite nanoparticles are characterised by a maghemite inclusion in a spherical matrix of amorphous silicon dioxide. The surface chemistry and interaction of the nanoparticles are similar to amorphous silicon dioxide nanoparticles as long as the silica matrix is closed.

**Assessment Approach:** Evaluation of hazard data of silica nanoparticles as analogous material.

**Hazard data:** OECD Safety Data Sheet on silica nanoparticles<sup>4</sup>. Amorphous silicon dioxide nanoparticles NM 200 - NM 204 in OECD testing program.

**Table 6:** Toxicity evaluation of silica nanoparticles.

|                               | NM 200                           | NM 201                           | NM 202                        | NM 203                        | NM 204                                   | Methods                   | Hazard group allocation | Limits by ISO TG 12901-2    |
|-------------------------------|----------------------------------|----------------------------------|-------------------------------|-------------------------------|------------------------------------------|---------------------------|-------------------------|-----------------------------|
| Acute toxicity - inhalation - | No signs of toxicity             | No signs of toxicity             | No signs of toxicity          | No signs of toxicity          | -                                        | OECD TG 403               | A                       | > 5 mg/L                    |
| Acute toxicity - oral -       | LD50 (rat)<br>> 2000 mg/kg bw    | LD50 (rat)<br>> 2000 mg/kg bw    | LD50 (rat)<br>> 3300 mg/kg bw | LD50 (rat)<br>> 3300 mg/kg bw | LD50 (rat)<br>> 2000 mg/kg bw            | OECD TG 401               | A                       | > 2000 mg/kg bw             |
| Acute toxicity - dermal -     | LD50 (rabbit)<br>> 5000 mg/kg bw | LD50 (rabbit)<br>> 5000 mg/kg bw | -                             | -                             | LD50 (rabbit)<br>> 5000 mg/kg bw         | Draize Test               | A                       | > 2000 mg/kg bw             |
| Skin irritation               | No signs of irritation           | No signs of irritation           | No signs of irritation        | No signs of irritation        | No signs of irritation                   | OECD TG 404               | A                       | No or low signs of toxicity |
| Eye irritation                | No signs of irritation           | No signs of irritation           | No signs of irritation        | No signs of irritation        | Weakly irritation, reversible after 72 h | Draize Test               | A                       | No or low signs of toxicity |
| Mutagenicity                  | No signs of toxicity             | No signs of toxicity             | No signs of toxicity          | No signs of toxicity          | -                                        | OECD TG 471, 473, 474,476 | A                       | No signs of toxicity        |
| Carcinogenicity               | Negative*                        |                                  |                               |                               |                                          | OECD TG 453               |                         | No signs of toxicity        |
| Reproductive toxicity         | No signs of toxicity             | -                                | No signs of toxicity          | No signs of toxicity          | -                                        | OECD TG 415, 416          | A                       | No signs of toxicity        |

bw body weight

\* Based on data of bulk substance

<sup>4</sup> SILICON DIOXIDE: SUMMARY OF THE DOSSIER Series on the Safety of Manufactured Nanomaterials No. 71, ENV/JM/MONO(2016)23, Organisation for Economic Cooperation and Development OECD, 2016.

## Supplementary Information

### Occupational safety assessment – Stoffenmanager Nano 1.0

**Table 7:** Description of the employees working conditions in Scenario A – D for evaluation of exposure score in occupational safety assessment using Stoffenmanager Nano.

|                                                                                             | Scenario A                                                | Scenario B                                                                                                                                                                              | Scenario C                                                                                                                                                         | Scenario D                                                                                                                                          |
|---------------------------------------------------------------------------------------------|-----------------------------------------------------------|-----------------------------------------------------------------------------------------------------------------------------------------------------------------------------------------|--------------------------------------------------------------------------------------------------------------------------------------------------------------------|-----------------------------------------------------------------------------------------------------------------------------------------------------|
|                                                                                             | Continuous manufacturing of nanoparticles in LAVA or FSP. | Maintenance of process plant once a year (e.g. exchange of filter system) without use / with personal protective equipment (filter mask FFP2 or full-face powered air respirator TMP3). | Filling and packaging of the nanoparticles as sterile pharmaceutical product, change in potential exposure risk due to separate filling system (e.g. a glove box). | Transport and storage of the packaged final pharmaceutical product.                                                                                 |
| Source domain                                                                               | Release of primary particles during actual synthesis      | Handling of bulk aggregated/agglomerated nanopowders                                                                                                                                    | Spraying or dispersion of a ready-to-use nanoproduct                                                                                                               | Spraying or dispersion of a ready-to-use nanoproduct                                                                                                |
| Product type                                                                                |                                                           |                                                                                                                                                                                         | Intermediate                                                                                                                                                       | Ready-to-use nanoproduct                                                                                                                            |
| Product appearance                                                                          | Powder                                                    | Powder                                                                                                                                                                                  | Liquid suspension                                                                                                                                                  | Liquid suspension                                                                                                                                   |
| Dustiness                                                                                   | High                                                      | High                                                                                                                                                                                    | -                                                                                                                                                                  | -                                                                                                                                                   |
| Moisture content                                                                            | Dry product                                               | Dry product                                                                                                                                                                             | -                                                                                                                                                                  | -                                                                                                                                                   |
| Viscosity of the liquid                                                                     | -                                                         | -                                                                                                                                                                                       | Low (like water)                                                                                                                                                   | Low (like water)                                                                                                                                    |
| Mass concentration in the product                                                           | 100%                                                      | 100%                                                                                                                                                                                    | 2.5% <sup>d</sup>                                                                                                                                                  | 2.5% <sup>d</sup>                                                                                                                                   |
| Does the product contain fibers?                                                            | No                                                        | No                                                                                                                                                                                      | No                                                                                                                                                                 | No                                                                                                                                                  |
| Inhalation hazard                                                                           | Non hazardous                                             | Non hazardous                                                                                                                                                                           | Non hazardous                                                                                                                                                      | Non hazardous                                                                                                                                       |
| Characterize your task                                                                      | Flame pyrolysis <sup>a</sup>                              | Handling of products in small amounts (up to 100 g)                                                                                                                                     | Handling of liquids using low pressure, low speed with large or medium quantities                                                                                  | Handling of (almost) undisturbed liquids (very low speed) very low quantities (under controlled conditions) of liquids in tightly closed containers |
| Duration task                                                                               | 4 to 8 hours a day <sup>b</sup>                           | 2 to 4 hours                                                                                                                                                                            | 4 to 8 hours                                                                                                                                                       | 4 to 8 hours a day                                                                                                                                  |
| Frequency task                                                                              | 4 to 5 days a week <sup>b</sup>                           | 1 day a month                                                                                                                                                                           | 4 to 5 days a week                                                                                                                                                 | 4 to 5 days a week                                                                                                                                  |
| Is the task carried out in the breathing zone of an employee (distance head-product < 1 m)? | No                                                        | Yes                                                                                                                                                                                     | Yes                                                                                                                                                                | No                                                                                                                                                  |

## Supplementary Information

(Table 7 continued)

|                                                                                                                                                              | Scenario A                                                                       | Scenario B                            | Scenario C                                     | Scenario D                            |
|--------------------------------------------------------------------------------------------------------------------------------------------------------------|----------------------------------------------------------------------------------|---------------------------------------|------------------------------------------------|---------------------------------------|
| Is the working room being cleaned daily?                                                                                                                     | No                                                                               | No                                    | Yes                                            | No                                    |
| Are inspections and maintenance of machines/ancillary equipment being done at least monthly to ensure good condition and proper functioning and performance? | Yes                                                                              | Yes                                   | Yes                                            | Yes                                   |
| Volume of the working room?                                                                                                                                  | < 100 m <sup>3</sup>                                                             | < 100 m <sup>3</sup>                  | < 100 m <sup>3</sup>                           | < 100 m <sup>3</sup>                  |
| Ventilation of the working room?                                                                                                                             | Mechanical and/or natural ventilation                                            | Mechanical and/or natural ventilation | Mechanical and/or natural ventilation          | Mechanical and/or natural ventilation |
| Local control measures?                                                                                                                                      | Glove boxes/bags <sup>c</sup>                                                    | No                                    | No control measures at the source <sup>e</sup> | No control measures at the source     |
|                                                                                                                                                              | -                                                                                | -                                     | Glove boxes/bags <sup>f</sup>                  | -                                     |
| Is the employee situated in a cabin?                                                                                                                         | The worker works in a cabin without a specific ventilation system (control room) | No                                    | The worker does not work in a cabin            | The worker does not work in a cabin   |
| Is personal protective equipment applied?                                                                                                                    | None                                                                             | None                                  | None                                           | None                                  |
|                                                                                                                                                              |                                                                                  | Filter mask FPP2                      | Filter mask FPP2                               |                                       |
|                                                                                                                                                              |                                                                                  | Full-face powered air respirator TMP3 | Full-face powered air respirator TMP3          |                                       |

<sup>a</sup> The term “flame pyrolysis” represents a gas phase manufacturing process.  
(see in detail table 8 in Van Duuren Stuurman et al. *Ann. Occup. Hyg.* **2012**, 56, 5, p. 525)

<sup>b</sup> Continuous manufacturing

<sup>c</sup> Completely enclosed manufacturing plant

<sup>d</sup> Suspension 25 mg/mL

<sup>e</sup> No separate enclosed filling system

<sup>f</sup> Separate enclosed filling system

## Supplementary Information

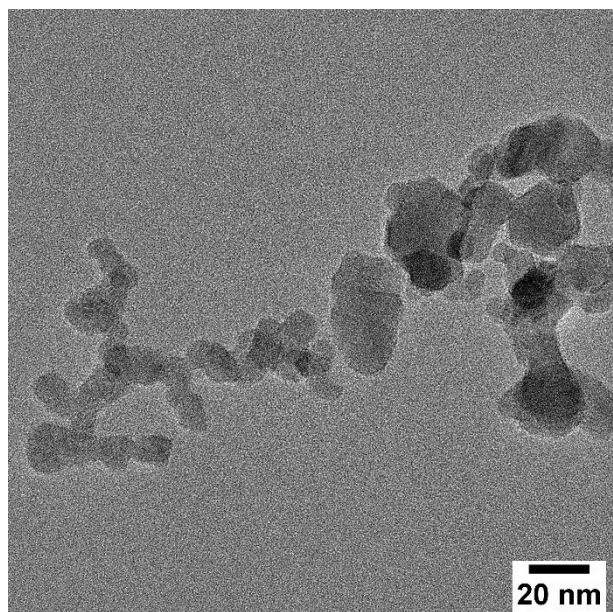

**Figure 1:** TEM image of iron oxide nanoparticles generated in a flame spray process on the pilot plant scale

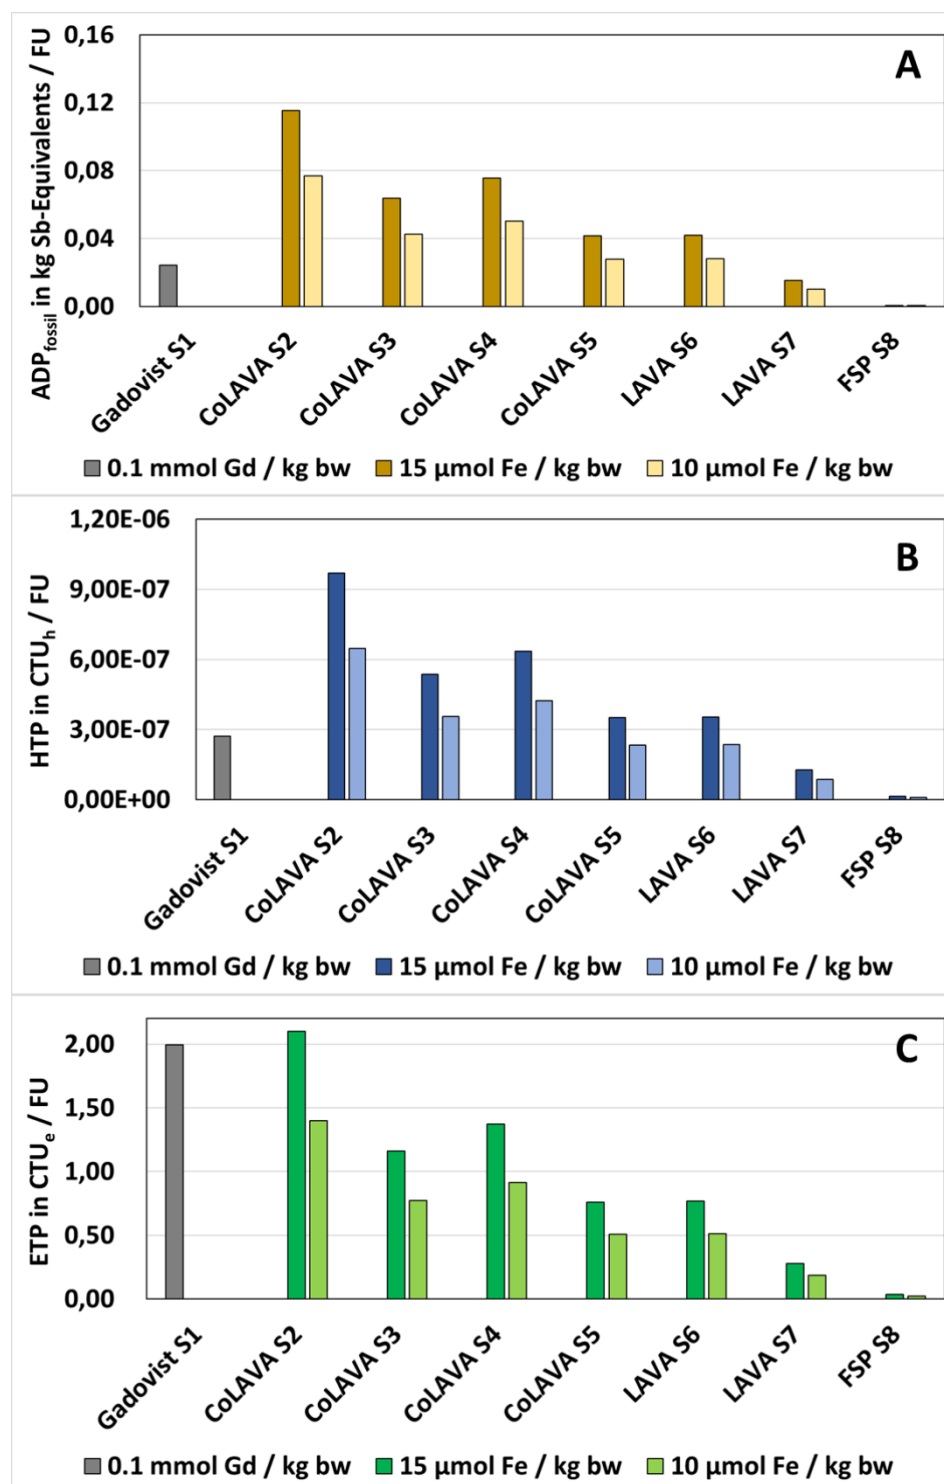

**Figure 2:** LCIA of SiliFe nanoparticle synthesis by CoLAVA-process,  $\gamma$ -Fe<sub>2</sub>O<sub>3</sub> nanoparticles by LAVA-process and FSP as well as Gadobutrol (Gadovist®) as reference – Resource Depletion Potential of fossil fuels (A), Human Toxicity Potential (B) and Ecotoxicity Potential (C)

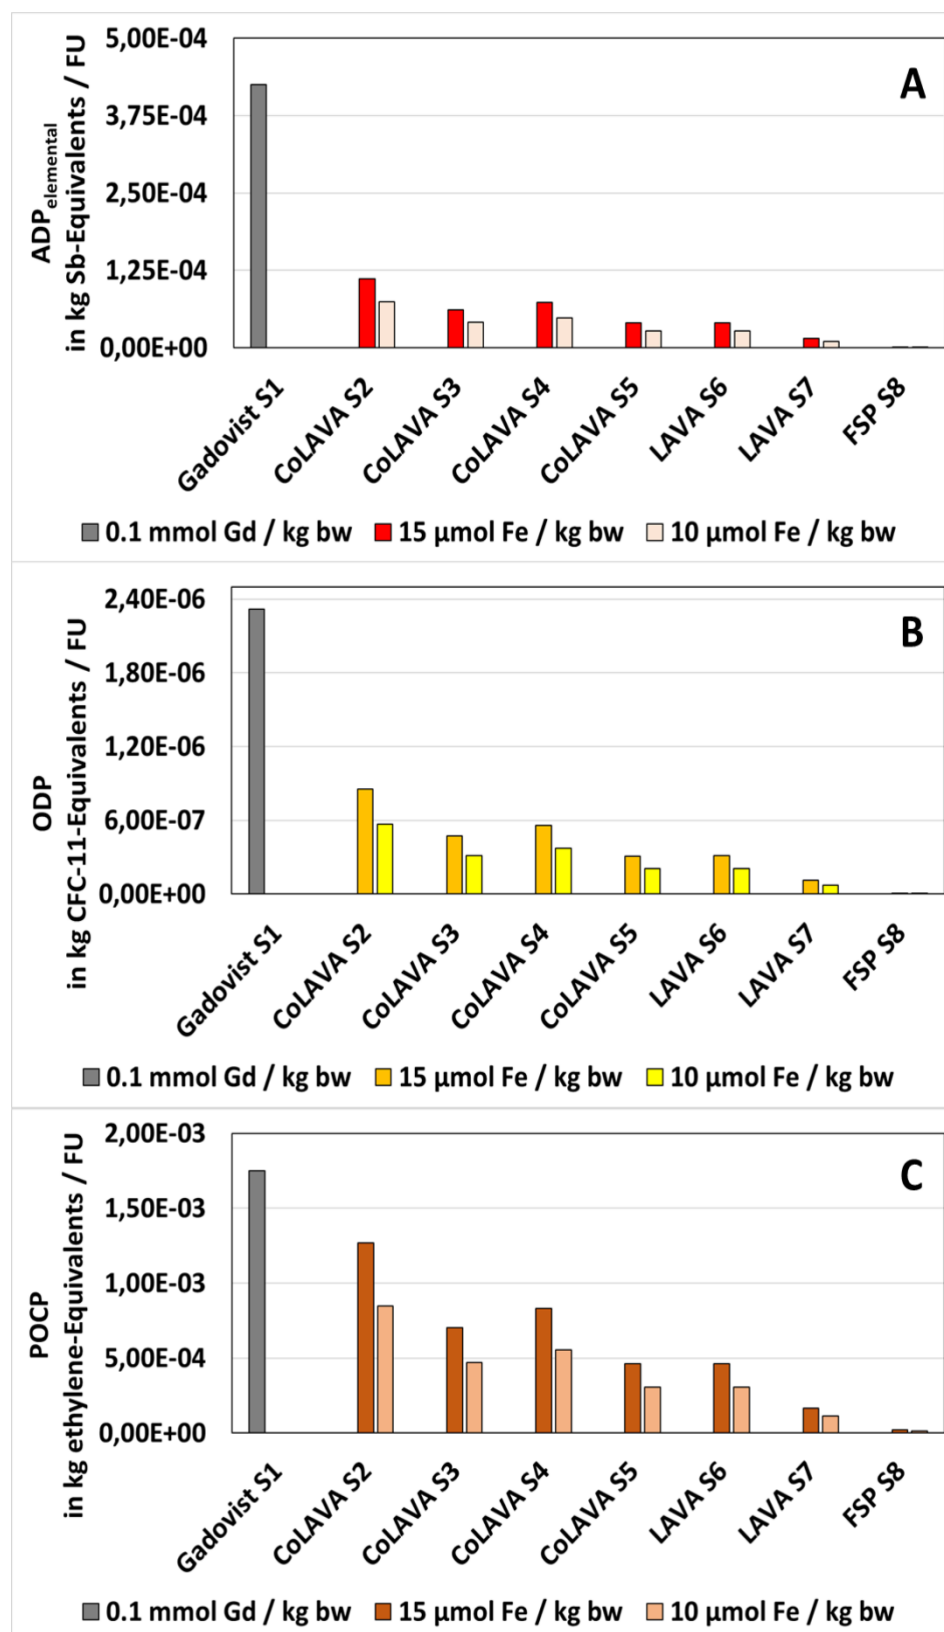

**Figure 3:** LCIA of SiliFe nanoparticle synthesis by CoLAVA-process,  $\gamma$ -Fe<sub>2</sub>O<sub>3</sub> nanoparticles by LAVA-process and FSP as well as Gadobutrol (Gadovist®) as reference – Resource Depletion Potential of metals and minerals (A), Ozone Depletion Potential (B) and Photochemical Ozone Creation Potential (C).

## Supplementary Information

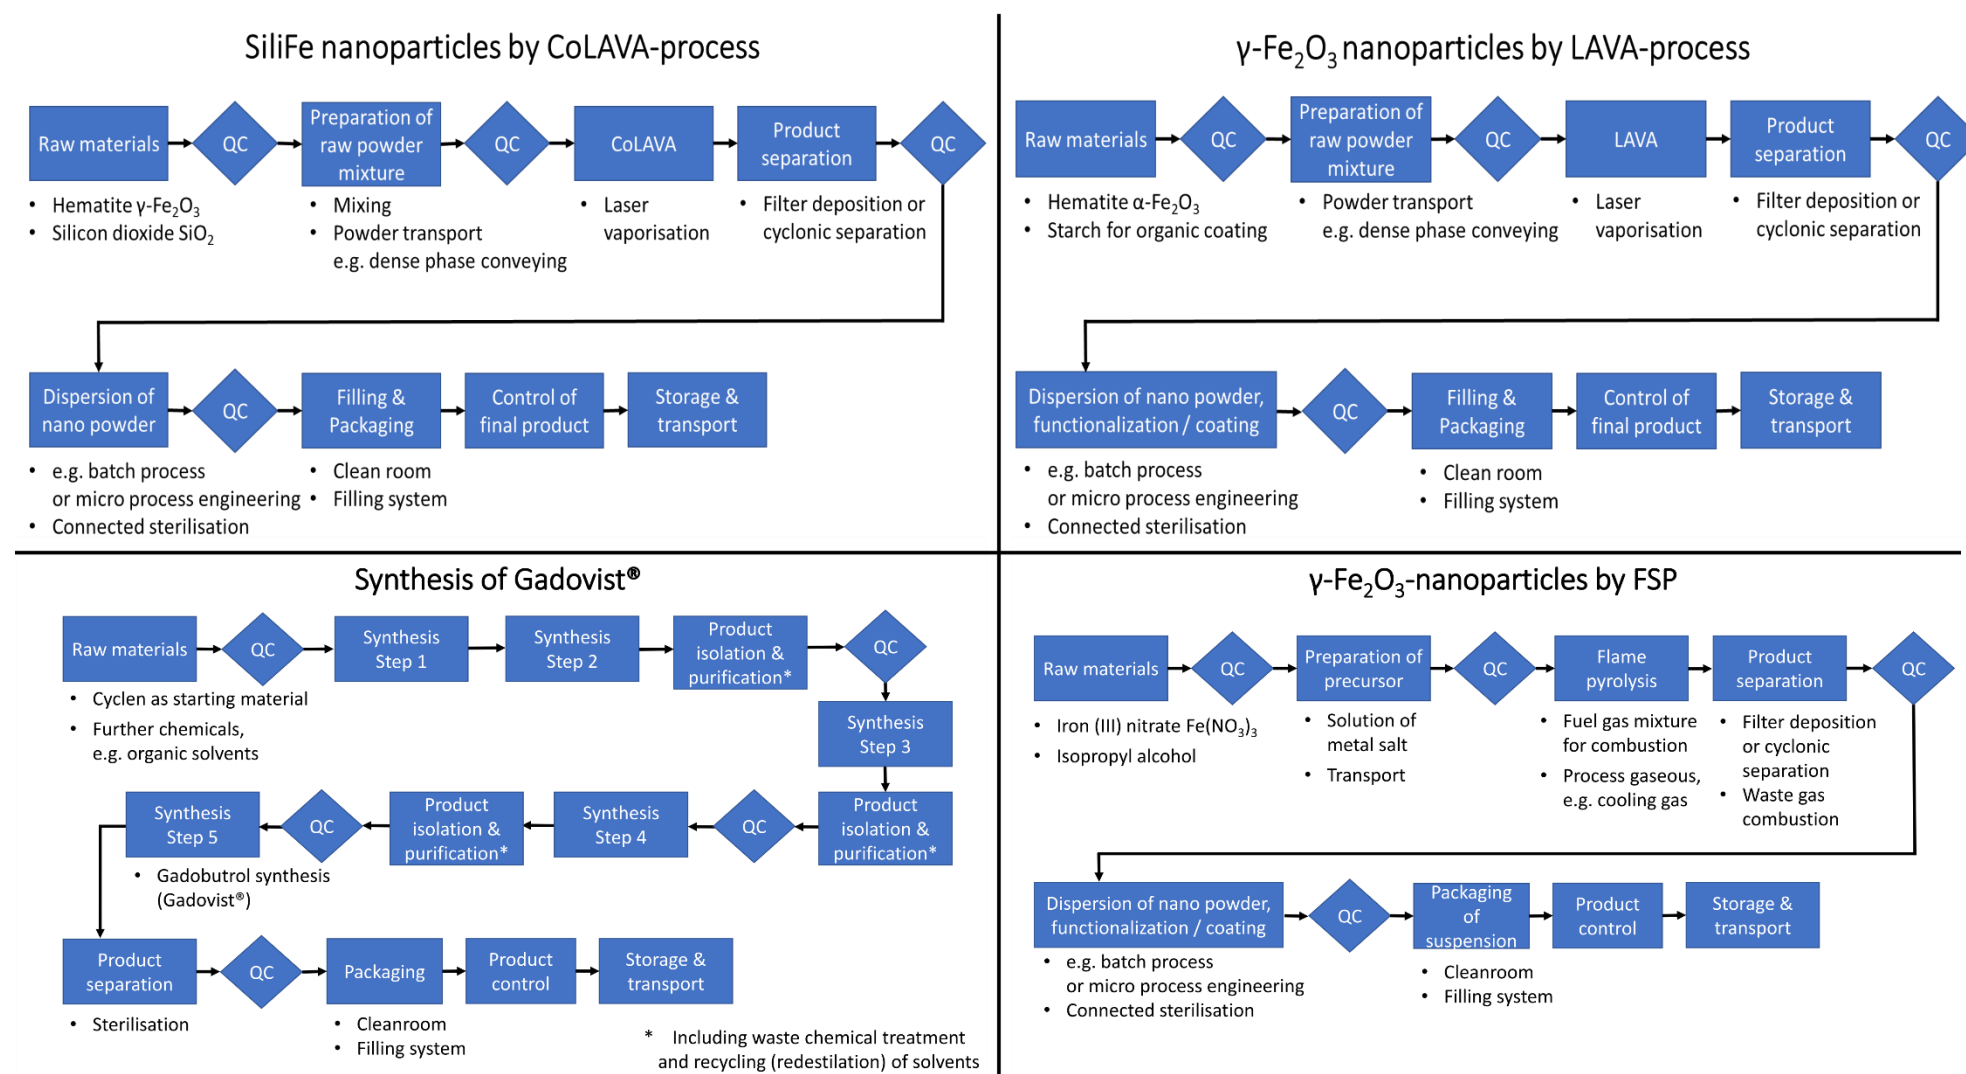

**Figure 4:** Process schemes for MRI diagnostic product containing SiliFe nanoparticle produced by CoLAVA-process,  $\gamma\text{-Fe}_2\text{O}_3$  nanoparticles produced by LAVA-process or FSP, alternatively containing Gadobutrol (Gadovist®).
